# Supplementary material for: Übertherapie und emotionale Erschöpfung in der „end-of-life care“
Source: Springer Nature journal article supplement (doi:10.1007/s00101-018-0485-7), 2018-09-12

**Abbildung 1: Skalen zur Messung des primären Outcomes**


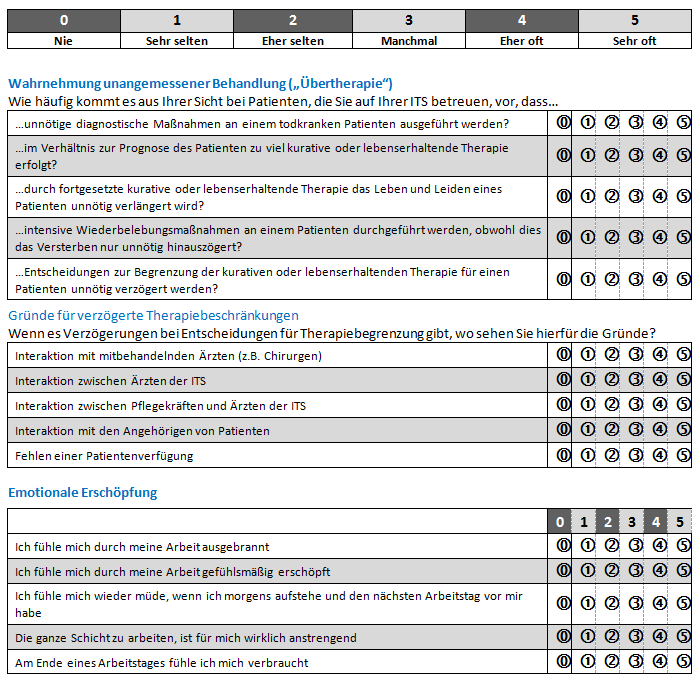
**Abbildung 2: Skalen zur Messung der Rahmenbedingungen der Arbeitsorganisation**


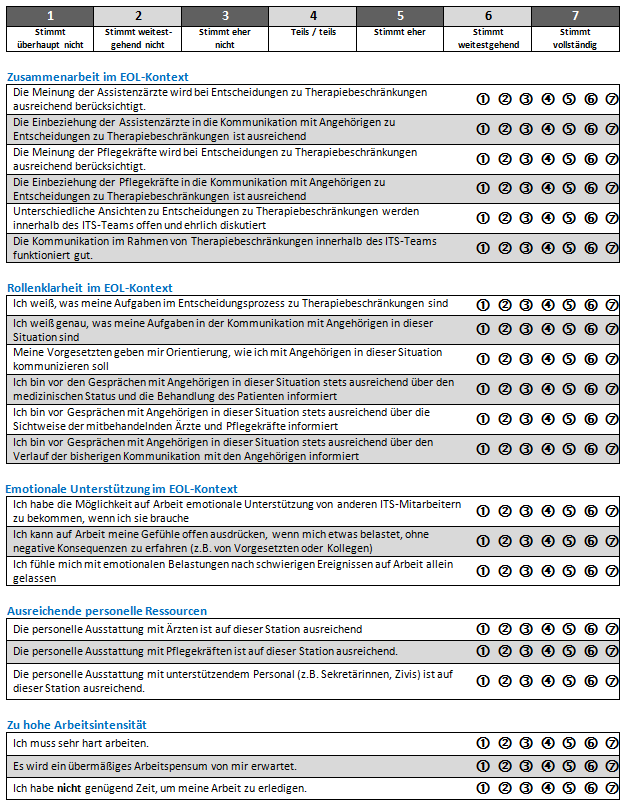


**Abbildung 2: Skalen zur Messung der Rahmenbedingungen der Arbeitsorganisation [Fortsetzung]**


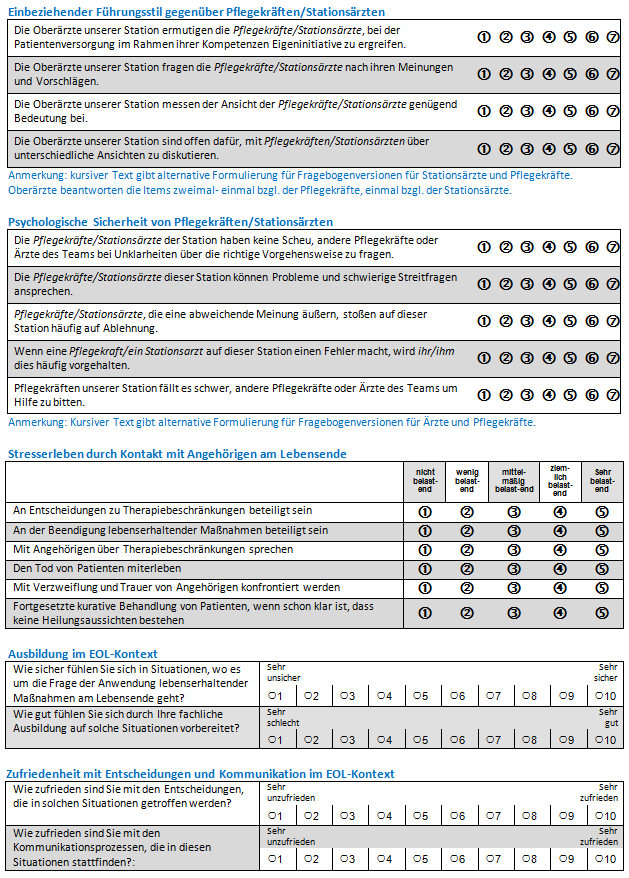

Supplement: MOESM1 [file 16117172]
